# Supplementary material for: Frequency and prognostic impact of ZEB2 H1038 and Q1072 mutations in childhood B-other acute lymphoblastic leukemia
Source: PubMed Central journal article supplement — Haematologica. 2020 Jun 4;106(3):886–90. doi: 10.3324/haematol.2020.249094 (PMC7927996; doi:10.3324/haematol.2020.249094), 2020-06-04

**Frequency and prognostic impact of ZEB2 H1038 and Q1072 mutations in childhood B-other acute lymphoblastic leukemia**

Marketa Zaliova,<sup>1,2,3</sup> Eliska Potuckova,<sup>1,2</sup> Julius Lukes Jr,<sup>1,2</sup> Lucie Winkowska,<sup>1,2</sup> Julia Starkova,<sup>1,2</sup> Iveta Janotova,<sup>3</sup> Lucie Sramkova,<sup>1,2,3</sup> Jan Stary,<sup>2,3</sup> Jan Zuna,<sup>1,2,3</sup> Martin Stanulla,<sup>4</sup> Martin Zimmermann,<sup>4</sup> Beat Bornhauser,<sup>5</sup> Jean-Pierre Bourquin,<sup>5</sup> Cornelia Eckert,<sup>6,7</sup> Gunnar Cario<sup>8</sup> and Jan Trka<sup>1,2,3</sup>

<sup>1</sup>CLIP: Childhood Leukemia Investigation Prague, Prague, Czech Republic; <sup>2</sup>Department of Pediatric Hematology and Oncology, Second Faculty of Medicine, Charles University, Prague, Czech Republic; <sup>3</sup>University Hospital Motol, Prague, Czech Republic; <sup>4</sup>Department of Pediatric Hematology and Oncology, Hannover Medical School, Hannover, Germany; <sup>5</sup>Division of Pediatric Oncology, University Children's Hospital, Zürich, Switzerland; <sup>6</sup>Department of Pediatric Oncology/Hematology, Charité - Universitätsmedizin Berlin, Freie Universität Berlin, Humboldt-Universität zu Berlin, and Berlin Institute of Health, Berlin, Germany; <sup>7</sup>German Cancer Consortium and German Cancer Research Center, Heidelberg, Germany and <sup>8</sup>Department of Pediatrics, University Medical Center Schleswig-Holstein, Kiel, Germany

Correspondence: MARKETA ZALIOVA - marketa.zaliova@lfmotol.cuni.cz

JAN TRKA - jan.trka@lfmotol.cuni.cz

doi:10.3324/haematol.2020.249094

## Frequency and prognostic impact of ZEB2 H1038 and Q1072 mutations in childhood B-other acute lymphoblastic leukemia

Marketa Zaliova, Eliska Potuckova, Julius Lukes Jr., Lucie Winkowska, Julia Starkova, Iveta Janotova, Lucie Sramkova, Jan Sary, Jan Zuna, Martin Stanulla, Martin Zimmermann, Beat Bornhauser, Jean-Pierre Bourquin, Cornelia Eckert, Gunnar Cario, Jan Trka

### SUPPLEMENTARY DATA

#### PATIENTS, MATERIAL AND METHODS

##### Patients

The discovery cohort of this study included 231 and 36 children (age 1-18 years) with newly diagnosed and relapsed, respectively, B-cell precursor ALL negative for routinely screened aberrations (B-other ALL – ALL negative for hypodiploidy ( $\leq 44$  chromosomes), high hyperdiploidy (51-67 chromosomes), *ETV6-RUNX1*, *BCR-ABL1*, *TCF3-PBX1* and *KMT2A*-involving gene fusions), who were diagnosed and treated in the Czech Republic between November 2002 and December 2017. The cohort of children with newly diagnosed B-other ALL represents 94% of all consecutively diagnosed children with this ALL subtype from the respective time period; in the remaining 6% of children no material was available for this study. These children were treated according to 3 consecutive protocols: ALLIC-BFM 2002 (ClinicalTrials.gov Identifier: NCT00764907), AIEOP-BFM ALL 2000 (ClinicalTrials.gov Identifier: NCT00430118) and AIEOP-BFM ALL 2009 (ClinicalTrials.gov Identifier: NCT01117441); the last two protocols utilized minimal residual disease monitoring for risk stratification. The median follow up time of the children who remained in continuous complete remission was 5.2 years (range 1-15 years). The cohort of children with relapsed B-other ALL represents 97% of all consecutive pediatric B-other ALL relapses from the respective time period, only a single child had no relapse material available for this study. Isolated extramedullary relapses were not excluded from the study. Thirty children are included in both cohorts (the cohort with newly diagnosed and the cohort of relapsed B-other ALL).

Validation cohorts comprised 626 and 102 children (age 1-18 years; single patient was a 20 years-old adult) with newly diagnosed and relapsed ALL, respectively, from Germany. Patients were selected based on the negativity of routinely screened aberrations (hypodiploidy, hyperdiploidy, *ETV6-RUNX1*, *BCR-ABL1*, *TCF3-PBX1* and *KMT2A-AFF1* gene fusions) and availability of material. The children with newly diagnosed ALL were treated on the AIEOP-BFM ALL 2000 (n=235) or AIEOP-BFM ALL 2009 (n=391) protocols. Only children with bone-marrow relapse or combined relapse with morphologically-detectable bone-marrow involvement were included in the validation relapse cohort.

The study was approved by ethical review boards of participating institutions and the informed consent was obtained from the patient's parents in accordance with the Declaration of Helsinki.

##### Biological samples processing

Mononuclear cells (MNCs) were separated from diagnostic and remission bone marrow aspirates and peripheral blood samples by Ficoll-Paque (Pharmacia, Germany) gradient centrifugation. Total DNA and RNA were isolated from MNCs, and RNA was transcribed into cDNA as a part of the routine sample processing procedure. DNA isolated from samples collected in remission or from separated T lymphocytes was used as germline for whole-exome sequencing.

##### Analysis of ZEB2 H1038 and Q1072 mutations

The presence of mutations was analyzed at DNA and/or RNA levels using whole-exome sequencing (WES), whole-transcriptome sequencing (RNAseq) and amplicon sequencing of DNA or cDNA (AmpliSeq-DNA, AmpliSeq-cDNA). Supplementary Table 2 shows methods used for the discovery cohorts. The choice of the method was influenced by the availability of already existing WES/RNAseq data and/or of material. Part of the leukemia cases were analyzed by more methods; in all but one case, results obtained by different methods were concordant. In one case, *ZEB2* Q1072R mutation with allele frequency 1.3% was detected by AmpliSeq-cDNA, while it was not detected by WES, RNAseq and AmpliSeq-DNA. Validation cohorts were analyzed by AmpliSeq-DNA.

### **Whole-exome and whole-transcriptome sequencing, subtype classification**

Sequencing and data analysis (variant calling, fusion detection, gene expression analysis and hierarchical clustering analysis) were performed as described previously (Zaliova et al., *Haematologica* 2019; doi: 10.3324/haematol.2018.204974).

In addition to routinely screened genetic aberrations, *DUX4* rearrangement (r), *ZNF384r*, *MEF2Dr*, *NUTM1r*, *TCF3-HLF*, *PAX5* P80R, *IKZF1* N159Y and *BCR-ABL1*-like and *ETV6-RUNX1*-like gene expression signatures were considered as subtype-defining.

Presence of gene expression signatures was analyzed by hierarchical clustering analyses (HCA). For HCA, we pooled 30 and 10 samples of *ZEB2*mut-positive patients from initial manifestations and relapses, respectively, with the cohort of 110 patients with B-other ALL presented in our previous study (Zaliova et al., *Haematologica* 2019; doi: 10.3324/haematol.2018.204974). To verify co-clustering of *BCR-ABL1*-like and *ETV6-RUNX1*-like subtypes with the respective genetic groups, we amended the cohort with 2 *BCR-ABL1*-positive and 9 *ETV6-RUNX1*-positive ALL cases.

### **Deep amplicon sequencing**

To perform bi-directional sequencing, part of the *ZEB2* coding region (chr2:145147414-145147587; hg19) spanning over codons H1038 and Q1072 (NM\_014795) was amplified from DNA/cDNA in 2 separate single-round PCR reactions using primer pairs listed in Supplementary Table 3. Resulting indexed libraries were sequenced on Ion Torrent PGM using 400bp chemistry according to the manufacturer's instructions (Life Technologies, USA). Fastq files were processed from raw data and reads were mapped to hg19 using Torrent Suite software (Life Technologies). Variant calling was performed using Variant Caller plugin in Torrent Suite software (parameter settings: somatic variant frequency, low stringency). Mapped reads were visually inspected in IGV.

Error rate at the positions of interest was repeatedly analyzed by sequencing of DNA from buffy coats collected from healthy individuals. It reached on average 0.09% and 0.06% (medians 0.05% and 0.07%) for codons H1038 (chr2:145147549-145147551) and Q1072 (chr2: 145147447-145147449), respectively. The median sequencing depths were 10263 and 10966 for codons H1038 and Q1072, respectively (ranges 1230-52681 and 1328-53561 reads). The mutation screening was performed using sensitivity of detection set to 1% mutated allele frequency (which corresponds to 2% cells with the mutation).

### **Statistical analysis**

The Mann-Whitney U test was used to compare numerical parameters. The Fisher exact probability test was used to compare frequencies. The Kaplan-Meier method was used to estimate survival rates, differences were compared with the 2-sided log-rank test. Event-free survival (EFS) was defined as the time from diagnosis to the date of last follow-up in complete remission or to the first event. Events were resistance to therapy (non-response), relapse, secondary neoplasm or death from any cause. Failure to achieve remission due to early death or non-response was considered as events at time zero. Patients lost to follow-up were censored at the time of their withdrawal. Cumulative incidence functions for competing events were estimated according to Kalbfleisch and Prentice and were compared with Gray's test.

SUPPLEMENTARY TABLES

Table 1. Demographic, clinical and genetic characteristics of ZEB2mut-positive patients.

| Case ID | Cohort      | Gender | Age (years) | WBC (x10 <sup>9</sup> /l) | Treatment (DG)  | Risk (DG) | ALL subtype          | Outcome             | Follow-up time for CCR / Time to event (years) | ZEB2mut in DG | ZEB2mut VAF in DG - DNA | ZEB2mut VAF in DG - cDNA | ZEB2mut in REL | ZEB2mut VAF in REL - DNA | ZEB2mut VAF in REL - cDNA | RNAseq of DG performed? | Additional genetic findings in DG                             | RNAseq of REL performed? | Additional genetic findings in REL                |
|---------|-------------|--------|-------------|---------------------------|-----------------|-----------|----------------------|---------------------|------------------------------------------------|---------------|-------------------------|--------------------------|----------------|--------------------------|---------------------------|-------------------------|---------------------------------------------------------------|--------------------------|---------------------------------------------------|
| 865     | D-DG        | M      | 17          | 4                         | ALL IC-BFM 2002 | MR        | B-other              | REL-BM              | 3,8                                            | H1038R        | n.a.                    | 94%                      | n.a.           | n.a.                     | n.a.                      | Yes                     | -                                                             | No                       | n.ap.                                             |
| 1098    | D-DG, D-REL | F      | 14          | 20                        | ALL IC-BFM 2002 | MR        | DUX4r                | REL-BM              | 3,4                                            | H1038R        | 14%                     | 20%                      | H1038R         | 44%                      | 18%                       | Yes                     | -                                                             | No                       | n.ap.                                             |
| 1883    | D-DG, D-REL | M      | 12          | 7                         | ALL-BFM 2009    | HR        | B-other              | REL-BM              | 2,1                                            | H1038R        | 79%                     | 25%                      | H1038R         | 67%                      | 93%                       | Yes                     | -                                                             | Yes                      | NT5C2 R238W, NT5C2 R367Q                          |
| 1114    | D-DG, D-REL | M      | 17          | 16                        | ALL IC-BFM 2002 | MR        | DUX4r                | REL-EM <sup>3</sup> | 2,1                                            | Q1072R        | 7%                      | 7%                       | Q1072R         | 37%                      | 42%                       | Yes                     | -                                                             | No                       | n.ap.                                             |
| 2058    | D-DG, D-REL | M      | 3           | 5                         | ALL-BFM 2009    | SR        | B-other              | REL-BM+CNS          | 3,2                                            | Q1072R        | 18%                     | 22%                      | Q1072R         | 30%                      | 37%                       | Yes                     | P2RY8-CRLF2                                                   | Yes                      | SETD2 Y1666C                                      |
| 2134    | D-DG, D-REL | F      | 4           | 10                        | ALL-BFM 2009    | MR        | DUX4r                | REL-EM <sup>4</sup> | 2,6                                            | Q1072R        | 0%                      | 1%                       | Q1072R         | 28%                      | 42%                       | Yes                     | IGH-MYC                                                       | Yes                      | -                                                 |
| 835     | D-DG        | F      | 7           | 6                         | ALL IC-BFM 2002 | MR        | B-other              | CCR                 | 9,2                                            | H1038R        | n.a.                    | 32%                      | n.ap.          | n.ap.                    | n.ap.                     | Yes                     | ZEB2-TEX41 (of) <sup>5</sup>                                  | No                       | n.ap.                                             |
| 1323    | D-DG        | F      | 16          | 2                         | ALL-BFM 2000    | MR        | DUX4r                | CCR                 | 9,0                                            | Q1072K        | n.a.                    | 94%                      | n.ap.          | n.ap.                    | n.ap.                     | Yes                     | -                                                             | No                       | n.ap.                                             |
| 1154    | D-DG        | M      | 2           | 19                        | ALL-BFM 2000    | SR        | B-other              | CCR                 | 6,0                                            | Q1072R        | 28%                     | 39%                      | n.ap.          | n.ap.                    | n.ap.                     | Yes                     | P2RY8-CRLF2                                                   | No                       | n.ap.                                             |
| 206     | D-REL       | M      | 6           | 8                         | ALL-BFM 95      | SR        | B-other              | REL-BM              | 5,3                                            | H1038R        | 9%                      | 28%                      | H1038R         | 86%                      | na                        | Yes                     | ZEB2-GTDC1 (of) <sup>5</sup>                                  | No                       | n.ap.                                             |
| 961     | D-DG, D-REL | M      | 12          | 3                         | ALL IC-BFM 2002 | HR        | iAMP21               | REL-BM              | 2,5                                            | No            | n.ap.                   | n.ap.                    | Q1072R         | 9%                       | 17%                       | Yes                     | PAX5-BCAS4, KMT2D R5027*, SETD2 I2482fs                       | No                       | n.ap.                                             |
| 1768    | D-DG, D-REL | M      | 1           | 3                         | ALL-BFM 2009    | SR        | B-other              | REL-BM              | 1,3                                            | No            | n.ap.                   | n.ap.                    | H1038R         | 41%                      | 43%                       | Yes                     | PAX5-PML, P2RY8-CRLF2, CBFA2T3-SLC7A5, JAK1 V658I             | Yes                      | PAX5-PML, P2RY8-CRLF2, CBFA2T3-SLC7A5, NT5C2 K25E |
| FB62    | V-DG, V-REL | M      | 7           | 137                       | ALL BFM 2000    | MR        | B-other              | REL-BM              | 2,7                                            | H1038R        | 39%                     | 36%                      | H1038R         | 42%                      | 40%                       | Yes                     | -                                                             | Yes                      | -                                                 |
| H 46    | V-DG, V-REL | F      | 12          | 4                         | ALL BFM 2000    | HR        | B-other              | REL-BM              | 3,8                                            | H1038R        | 28%                     | 20%                      | H1038R         | 37%                      | 42%                       | Yes                     | NRAS Q61K                                                     | Yes                      | CSDE1-ST7L, KRAS A146V                            |
| B 150   | V-DG        | F      | 5           | 40                        | ALL BFM 2000    | MR        | B-other              | REL-BM              | 1,8                                            | Q1072R        | 16%                     | 19%                      | No             | n.ap.                    | n.ap.                     | Yes                     | -                                                             | Yes                      | -                                                 |
| MA5     | V-DG        | F      | 5           | 3                         | ALL-BFM 2009    | SR        | B-other              | REL-CNS             | 2,0                                            | Q1072R        | 9%                      | 23%                      | n.a.           | n.a.                     | n.a.                      | Yes                     | ATG4D-PDE4A                                                   | No                       | n.ap.                                             |
| U 131   | V-DG        | M      | 16          | 9                         | ALL BFM 2000    | MR        | B-other              | CCR                 | 6,8                                            | H1038R        | 40%                     | 41%                      | n.ap.          | n.ap.                    | n.ap.                     | Yes                     | FLT3 D839G, L576R, N676K                                      | No                       | n.ap.                                             |
| G19     | V-DG        | F      | 9           | 15                        | ALL-BFM 2009    | SR        | B-other              | CCR                 | 6,1                                            | H1038R        | 38%                     | 44%                      | n.ap.          | n.ap.                    | n.ap.                     | Yes                     | IGH-CEBPA                                                     | No                       | n.ap.                                             |
| RG31    | V-DG        | M      | 6           | 20                        | ALL-BFM 2009    | HR        | ZNF384r <sup>2</sup> | CCR                 | 6,0                                            | H1038R        | 22%                     | 22%                      | n.ap.          | n.ap.                    | n.ap.                     | Yes                     | -                                                             | No                       | n.ap.                                             |
| WB35    | V-DG        | F      | 15          | 41                        | ALL-BFM 2009    | HR        | B-other              | CCR                 | 4,3                                            | H1038R        | 39%                     | 40%                      | n.ap.          | n.ap.                    | n.ap.                     | Yes                     | TP53 P278L, NRAS Y64D                                         | No                       | n.ap.                                             |
| WB23    | V-DG        | F      | 9           | 3                         | ALL-BFM 2009    | HR        | B-other              | Died                | 0,7                                            | H1038R        | 42%                     | 44%                      | n.ap.          | n.ap.                    | n.ap.                     | Yes                     | PTPN11 G60V                                                   | No                       | n.ap.                                             |
| KI15    | V-DG        | F      | 9           | 6                         | ALL BFM 2000    | MR        | DUX4r                | CCR                 | 10,2                                           | Q1072K        | 2%                      | 1%                       | n.ap.          | n.ap.                    | n.ap.                     | Yes                     | -                                                             | No                       | n.ap.                                             |
| B 65    | V-DG        | F      | 4           | 4                         | ALL-BFM 2009    | SR        | B-other              | CCR                 | 1,7                                            | Q1072R        | 36%                     | 40%                      | n.ap.          | n.ap.                    | n.ap.                     | Yes                     | P2RY8-CRLF2, JAK2 D873N, TP53 E258G, ZEB2 A1035G <sup>6</sup> | No                       | n.ap.                                             |
| B 80    | V-DG        | F      | 3           | 8                         | ALL-BFM 2009    | MR        | B-other              | CCR                 | 3,3                                            | Q1072R        | 6%                      | 10%                      | n.ap.          | n.ap.                    | n.ap.                     | Yes                     | P2RY8-CRLF2, CRLF2 F232C, CRLF2 V244M                         | No                       | n.ap.                                             |
| E 46    | V-DG        | F      | 3           | 3                         | ALL-BFM 2009    | SR        | B-other              | CCR                 | 3,6                                            | Q1072R        | 7%                      | 30%                      | n.ap.          | n.ap.                    | n.ap.                     | Yes                     | PAX5 E105*                                                    | No                       | n.ap.                                             |
| HV70    | V-DG        | F      | 2           | 41                        | ALL-BFM 2009    | MR        | B-other              | CCR                 | 5,1                                            | Q1072R        | 20%                     | 39%                      | n.ap.          | n.ap.                    | n.ap.                     | Yes                     | P2RY8-CRLF2                                                   | No                       | n.ap.                                             |
| KI16    | V-DG        | F      | 4           | 35                        | ALL-BFM 2009    | SR        | B-other              | CCR                 | 6,2                                            | Q1072R        | 29%                     | 44%                      | n.ap.          | n.ap.                    | n.ap.                     | Yes                     | P2RY8-CRLF2                                                   | No                       | n.ap.                                             |
| S 29    | V-DG        | F      | 3           | 30                        | ALL-BFM 2009    | MR        | B-other              | CCR                 | 6,3                                            | Q1072R        | 4%                      | 7%                       | n.ap.          | n.ap.                    | n.ap.                     | Yes                     | P2RY8-CRLF2, PAX5 V319_P320fs, PAX5 A111T                     | No                       | n.ap.                                             |
| RG51    | V-DG        | F      | 9           | 8                         | ALL-BFM 2009    | HR        | TCF3/HLF             | Died                | 0,0                                            | Q1072R        | 8%                      | 20%                      | n.ap.          | n.ap.                    | n.ap.                     | Yes                     | NRAS G13D                                                     | No                       | n.ap.                                             |
| B 207   | V-REL       | M      | 14          | 6                         | ALL BFM 2000    | MR        | B-other              | REL-BM+EM           | 2,5                                            | H1038R        | 25%                     | 88%                      | H1038R         | 34%                      | 94%                       | Yes                     | NRAS G12D                                                     | Yes                      | -                                                 |
| KI63    | V-REL       | F      | 20          | 22                        | ALL BFM 2000    | MR        | B-other <sup>1</sup> | REL-BM              | 0,9                                            | H1038R        | 36%                     | n.a.                     | H1038R         | 22%                      | 28%                       | No                      | n.ap.                                                         | Yes                      | IGH-CEBPA                                         |
| HV62    | V-REL       | F      | 13          | 111                       | ALL BFM 2000    | HR        | DUX4r <sup>1</sup>   | REL-BM              | 3,3                                            | No            | n.ap.                   | n.ap.                    | H1038R         | 38%                      | 42%                       | No                      | n.ap.                                                         | Yes                      | KRAS G12V                                         |

D-discovery, V - validation, DG - initial ALL manifestation, REL - ALL relapse, F -female, M - male, WBC - white blood cell count, SR/MR/HR - standard/medium/high risk, CCR - continuous complete remission, r-rearrangement, BM - bone marrow, EM - extramedullary, CNS - central nervous system, n.a. - not analyzed, n.ap. - not applicable, RNAseq - whole transcriptome sequencing, of -out-of-frame;

1 - Subtype assigned using RNAseq data from relapse; 2 - EP300-ZNF384; 3 - isolated testicular relapse; 4 - isolated relapse in uterus; 5 - the rearranged allele carries H1038R mutation; 6 - affects second ZEB2 allele

**Supplementary Table 2. Methods used for ZEB2 mutation screening in discovery cohorts.**

| Method |        |              |               | Initial manifestation |                              | Relapse            |                              |
|--------|--------|--------------|---------------|-----------------------|------------------------------|--------------------|------------------------------|
| WES    | RNAseq | AmpliSeq-DNA | AmpliSeq-cDNA | Cases analyzed (n)    | Positive out of analyzed (n) | Cases analyzed (n) | Positive out of analyzed (n) |
| ✓      | ✓      | ✓            | ✓             | 1                     | 1*                           | 2                  |                              |
| ✓      | ✓      | ✓            |               | 15                    |                              | 6                  | 1                            |
| ✓      | ✓      |              |               | 63                    |                              | 3                  | 2                            |
| ✓      |        | ✓            |               | 1                     |                              | 2                  |                              |
|        | ✓      | ✓            | ✓             | 6                     | 5                            |                    |                              |
|        | ✓      | ✓            |               | 5                     |                              |                    |                              |
|        | ✓      |              | ✓             | 4                     | 3                            |                    |                              |
|        | ✓      |              |               | 47                    |                              |                    |                              |
|        |        | ✓            | ✓             |                       |                              | 4                  | 4                            |
|        |        | ✓            |               | 41                    |                              | 19                 | 1                            |
|        |        |              | ✓             | 48                    |                              |                    |                              |

\* Positive result only by AmpliSeq-cDNA, considered as positive

**Supplementary Table 3. Primers used to prepare libraries for amplicon sequencing.**

|               |        |                                                                                   |
|---------------|--------|-----------------------------------------------------------------------------------|
| primer pair 1 | P1-Fow | CCTCTCTATGGGCAGTCGGT-GAT- <b><i>CCACATCAGTGTCAGATTTGTAAGAAAGC</i></b>             |
|               | A-Rev  | CCATCTCATCCCTGCGTGTCTCCGACTCAG-index-GAT- <b><i>CCGCTTGCACTAGGAATACCTGTG</i></b>  |
| primer pair 2 | A-Fow  | CCATCTCATCCCTGCGTGTCTCCGACTCAGC-index-GAT- <b><i>CCGCTTGCACTAGGAATACCTGTG</i></b> |
|               | P1-Rev | CCTCTCTATGGGCAGTCGGT-GAT- <b><i>CCACATCAGTGTCAGATTTGTAAGAAAGC</i></b>             |

Dashes separate primer elements: P1 and A adapters, index, key, template specific primer (in bold italics)

**Supplementary Table 4. Ordered list of patients analyzed in unsupervised HCA presented on Figure 2.**

| Patient ID | DG/REL | ZEB2mut    | Accompanying-lesions | Subtype         | Left-to-right order in Figure 2 | Cluster (out of 16 clusters from left to right) |
|------------|--------|------------|----------------------|-----------------|---------------------------------|-------------------------------------------------|
| 2290*      | DG     | No         | ---                  | DUX4r           | 1                               | 1                                               |
| 2349*      | DG     | No         | ---                  | DUX4r           | 2                               | 1                                               |
| 2584*      | DG     | No         | ---                  | DUX4r           | 3                               | 1                                               |
| 2684*      | DG     | No         | ---                  | DUX4r           | 4                               | 1                                               |
| 2788*      | DG     | No         | ---                  | DUX4r           | 5                               | 1                                               |
| 2522*      | DG     | No         | ---                  | DUX4r           | 6                               | 1                                               |
| 2634*      | DG     | No         | ---                  | DUX4r           | 7                               | 1                                               |
| 1980*      | DG     | No         | ---                  | DUX4r           | 8                               | 1                                               |
| 2488*      | DG     | No         | ---                  | DUX4r           | 9                               | 1                                               |
| 1699*      | DG     | No         | ---                  | DUX4r           | 10                              | 1                                               |
| 1848*      | DG     | No         | ---                  | DUX4r           | 11                              | 1                                               |
| 2037*      | DG     | No         | ---                  | DUX4r           | 12                              | 2                                               |
| 1098       | DG     | H1038R-low | ---                  | DUX4r           | 13                              | 2                                               |
| 2441*      | DG     | No         | ---                  | DUX4r           | 14                              | 2                                               |
| 2062*      | DG     | No         | ---                  | DUX4r           | 15                              | 2                                               |
| 2650*      | DG     | No         | ---                  | DUX4r           | 16                              | 2                                               |
| 2613*      | DG     | No         | ---                  | DUX4r           | 17                              | 2                                               |
| 2673*      | DG     | No         | ---                  | DUX4r           | 18                              | 2                                               |
| 2350*      | DG     | No         | ---                  | DUX4r           | 19                              | 2                                               |
| 1638*      | DG     | No         | ---                  | DUX4r           | 20                              | 2                                               |
| 2731*      | DG     | No         | ---                  | DUX4r           | 21                              | 2                                               |
| 2134       | REL    | Q1072R     | ---                  | DUX4r           | 22                              | 3                                               |
| 1323       | DG     | Q1072K     | ---                  | DUX4r           | 23                              | 3                                               |
| 2065*      | DG     | No         | ---                  | DUX4r           | 24                              | 3                                               |
| 1114       | DG     | Q1072R-low | ---                  | DUX4r           | 25                              | 3                                               |
| 2134*      | DG     | Q1072R-low | ---                  | DUX4r           | 26                              | 3                                               |
| 1726*      | DG     | No         | ---                  | DUX4r           | 27                              | 3                                               |
| 1952*      | DG     | No         | ---                  | DUX4r           | 28                              | 3                                               |
| 2694*      | DG     | No         | ---                  | DUX4r           | 29                              | 3                                               |
| K115       | DG     | Q1072K-low | ---                  | DUX4r           | 30                              | 3                                               |
| 2617*      | DG     | No         | ---                  | DUX4r           | 31                              | 3                                               |
| 2052*      | DG     | No         | ---                  | DUX4r           | 32                              | 3                                               |
| 2028*      | DG     | No         | ---                  | DUX4r           | 33                              | 3                                               |
| 2287*      | DG     | No         | ---                  | DUX4r           | 34                              | 3                                               |
| 2629*      | DG     | No         | ---                  | DUX4r           | 35                              | 3                                               |
| 2212*      | DG     | No         | ---                  | ETV6-RUNX1      | 36                              | 4                                               |
| 1552*      | DG     | No         | ---                  | ETV6-RUNX1-like | 37                              | 4                                               |
| 2640*      | DG     | No         | CRLF2r               | ETV6-RUNX1-like | 38                              | 4                                               |
| 1674*      | DG     | No         | ---                  | ETV6-RUNX1      | 39                              | 4                                               |
| 2466*      | DG     | No         | ---                  | ETV6-RUNX1-like | 40                              | 4                                               |
| 2046*      | DG     | No         | ---                  | ETV6-RUNX1-like | 41                              | 4                                               |
| 912*       | DG     | No         | ---                  | ETV6-RUNX1      | 42                              | 4                                               |
| 1127*      | DG     | No         | ---                  | ETV6-RUNX1      | 43                              | 4                                               |
| 1236*      | DG     | No         | ---                  | ETV6-RUNX1      | 44                              | 4                                               |
| 1640*      | DG     | No         | ---                  | ETV6-RUNX1      | 45                              | 4                                               |
| 2475*      | DG     | No         | ---                  | ETV6-RUNX1      | 46                              | 4                                               |
| 2155*      | DG     | No         | ---                  | ETV6-RUNX1-like | 47                              | 4                                               |
| 1738*      | DG     | No         | ---                  | ETV6-RUNX1      | 48                              | 4                                               |
| 2534*      | DG     | No         | ---                  | ETV6-RUNX1      | 49                              | 4                                               |
| B150       | DG     | Q1072R-low | ---                  | B-rest          | 50                              | 5                                               |
| B150       | REL    | No         | ---                  | B-rest          | 51                              | 5                                               |
| 1641*      | DG     | No         | PAX5-AMP             | B-rest          | 52                              | 5                                               |
| 2544*      | DG     | No         | PAX5-fusion          | B-rest          | 53                              | 5                                               |
| 1768       | REL    | H1038R     | PAX5-fusion          | B-rest          | 54                              | 5                                               |
| 2548*      | DG     | No         | PAX5-fusion          | B-rest          | 55                              | 5                                               |
| 2564*      | DG     | No         | PAX5-fusion          | B-rest          | 56                              | 5                                               |
| 2359*      | DG     | No         | PAX5-AMP             | B-rest          | 57                              | 5                                               |
| 2701*      | DG     | No         | PAX5-fusion          | B-rest          | 58                              | 5                                               |
| 2760*      | DG     | No         | PAX5-AMP             | B-rest          | 59                              | 5                                               |
| 2097*      | DG     | No         | ---                  | B-rest          | 60                              | 5                                               |
| 1645*      | DG     | No         | ---                  | MEF2Dr          | 61                              | 5                                               |
| 2651*      | DG     | No         | ---                  | MEF2Dr          | 62                              | 5                                               |
| 1722*      | DG     | No         | ---                  | B-rest          | 63                              | 5                                               |
| 2730*      | DG     | No         | ---                  | B-rest          | 64                              | 5                                               |
| 2486*      | DG     | No         | ---                  | B-rest          | 65                              | 5                                               |
| 2606*      | DG     | No         | ---                  | B-rest          | 66                              | 5                                               |
| 2543*      | DG     | No         | CRLF2r               | BCR-ABL1-like   | 67                              | 5                                               |
| 2103*      | DG     | No         | ---                  | BCR-ABL1-like   | 68                              | 5                                               |
| 1682*      | DG     | No         | PAX5-AMP             | B-rest          | 69                              | 5                                               |
| 2663*      | DG     | No         | PAX5-fusion          | B-rest          | 70                              | 5                                               |
| 2319*      | DG     | No         | PAX5-fusion          | B-rest          | 71                              | 5                                               |
| 2578*      | DG     | No         | PAX5-fusion          | B-rest          | 72                              | 5                                               |
| 1929*      | DG     | No         | ---                  | B-rest          | 73                              | 5                                               |
| 2621*      | DG     | No         | PAX5-fusion          | B-rest          | 74                              | 5                                               |
| 1826*      | DG     | No         | PAX5-fusion          | B-rest          | 75                              | 5                                               |
| 2460*      | DG     | No         | ---                  | B-rest          | 76                              | 5                                               |
| 2524*      | DG     | No         | ---                  | B-rest          | 77                              | 5                                               |
| 2727*      | DG     | No         | ---                  | B-rest          | 78                              | 5                                               |
| 2596*      | DG     | No         | CRLF2r               | BCR-ABL1-like   | 79                              | 5                                               |
| 2618*      | DG     | No         | ---                  | B-rest          | 80                              | 5                                               |
| 1794*      | DG     | No         | CRLF2r               | BCR-ABL1-like   | 81                              | 6                                               |
| 1741*      | DG     | No         | ---                  | BCR-ABL1-like   | 82                              | 6                                               |
| 961        | DG     | No         | PAX5-fusion          | iAMP21          | 83                              | 6                                               |
| 2724*      | DG     | No         | CRLF2r               | iAMP21          | 84                              | 6                                               |
| 1551*      | DG     | No         | CRLF2r               | BCR-ABL1-like   | 85                              | 6                                               |
| 2479*      | DG     | No         | CRLF2r               | BCR-ABL1-like   | 86                              | 6                                               |
| 2078*      | DG     | No         | CRLF2r               | BCR-ABL1-like   | 87                              | 6                                               |
| 2689*      | DG     | No         | CRLF2r               | BCR-ABL1-like   | 88                              | 6                                               |
| 1838*      | DG     | No         | CRLF2r               | BCR-ABL1-like   | 89                              | 6                                               |
| 2623*      | DG     | No         | CRLF2r               | BCR-ABL1-like   | 90                              | 6                                               |
| 2058*      | DG     | Q1072R-low | CRLF2r               | B-rest          | 91                              | 7                                               |
| 2058       | REL    | Q1072R     | CRLF2r               | B-rest          | 92                              | 7                                               |
| 1154       | DG     | Q1072R     | CRLF2r               | B-rest          | 93                              | 7                                               |
| 1755*      | DG     | No         | ---                  | B-rest          | 94                              | 7                                               |
| FB62       | DG     | H1038R     | ---                  | B-rest          | 95                              | 7                                               |
| FB62       | REL    | H1038R     | ---                  | B-rest          | 96                              | 7                                               |
| U131       | DG     | H1038R     | ---                  | B-rest          | 97                              | 7                                               |
| 2001*      | DG     | No         | ---                  | B-rest          | 98                              | 7                                               |
| 2509*      | DG     | No         | ---                  | BCR-ABL1-like   | 99                              | 7                                               |
| 1886*      | DG     | No         | ---                  | PAX5_P80R       | 100                             | 8                                               |
| 2607*      | DG     | No         | ---                  | PAX5_P80R       | 101                             | 8                                               |
| 2221*      | DG     | No         | ---                  | PAX5_P80R       | 102                             | 8                                               |
| 2677*      | DG     | No         | ---                  | PAX5_P80R       | 103                             | 8                                               |
| 2779*      | DG     | No         | ---                  | B-rest          | 104                             | 8                                               |
| 2026*      | DG     | No         | ---                  | PAX5_P80R       | 105                             | 8                                               |
| 1852*      | DG     | No         | ---                  | NUTM1r          | 106                             | 9                                               |
| 2068*      | DG     | No         | ---                  | NUTM1r          | 107                             | 9                                               |
| 1768*      | DG     | No         | PAX5-fusion          | B-rest          | 108                             | 9                                               |
| 2415*      | DG     | No         | PAX5-fusion          | B-rest          | 109                             | 9                                               |
| 1846*      | DG     | No         | CRLF2r               | B-rest          | 110                             | 9                                               |
| 2377*      | DG     | No         | ---                  | B-rest          | 111                             | 9                                               |
| E46        | DG     | Q1072R-low | ---                  | B-rest          | 112                             | 10                                              |
| MA5        | DG     | Q1072R-low | ---                  | B-rest          | 113                             | 10                                              |
| G51        | DG     | Q1072R-low | ---                  | TCF3-HLF        | 114                             | 10                                              |
| HV70       | DG     | Q1072R     | CRLF2r               | B-rest          | 115                             | 10                                              |
| K116       | DG     | Q1072R     | CRLF2r               | B-rest          | 116                             | 10                                              |
| B80        | DG     | Q1072R-low | CRLF2r               | B-rest          | 117                             | 10                                              |
| B65        | DG     | Q1072R     | CRLF2r               | B-rest          | 118                             | 10                                              |
| S29        | DG     | Q1072R-low | CRLF2r               | B-rest          | 119                             | 10                                              |
| 2515*      | DG     | No         | ---                  | B-rest          | 120                             | 11                                              |
| 2188*      | DG     | No         | PAX5-fusion          | B-rest          | 121                             | 11                                              |
| 2328*      | DG     | No         | PAX5-AMP             | B-rest          | 122                             | 11                                              |
| 1867*      | DG     | No         | CRLF2r               | BCR-ABL1-like   | 123                             | 11                                              |
| 2042*      | DG     | No         | CRLF2r               | BCR-ABL1-like   | 124                             | 11                                              |
| GI9        | DG     | H1038R     | IGH-CEBPA            | B-rest          | 125                             | 12                                              |
| WB35       | DG     | H1038R     | ---                  | B-rest          | 126                             | 12                                              |
| WB23       | DG     | H1038R     | ---                  | B-rest          | 127                             | 12                                              |
| 1633*      | DG     | No         | ---                  | BCR-ABL1-like   | 128                             | 12                                              |
| 2368*      | DG     | No         | ---                  | BCR-ABL1-like   | 129                             | 12                                              |
| 2720*      | DG     | No         | ---                  | B-rest          | 130                             | 13                                              |
| 2612*      | DG     | No         | ---                  | ZNF384r         | 131                             | 13                                              |
| 1861*      | DG     | No         | ---                  | B-rest          | 132                             | 13                                              |
| 2786*      | DG     | No         | ---                  | ZNF384r         | 133                             | 13                                              |
| 1584*      | DG     | No         | ---                  | ZNF384r         | 134                             | 13                                              |
| 1847*      | DG     | No         | ---                  | ZNF384r         | 135                             | 13                                              |
| 2473*      | DG     | No         | ---                  | iAMP21          | 136                             | 14                                              |
| 1733       | REL    | No         | ---                  | iAMP21          | 137                             | 14                                              |
| 1678*      | DG     | No         | ---                  | iAMP21          | 138                             | 14                                              |
| 1915*      | DG     | No         | ---                  | B-rest          | 139                             | 14                                              |
| 2299*      | DG     | No         | ---                  | B-rest          | 140                             | 14                                              |
| 206        | DG     | H1038R-low | ---                  | B-rest          | 141                             | 14                                              |
| 865        | DG     | H1038R     | ---                  | B-rest          | 142                             | 14                                              |
| 1304*      | DG     | No         | ---                  | BCR-ABL1        | 143                             | 14                                              |
| 2726*      | DG     | No         | ---                  | BCR-ABL1        | 144                             | 14                                              |
| G31        | DG     | H1038R     | ---                  | ZNF384r         | 145                             | 14                                              |
| 2141*      | DG     | No         | ---                  | ZNF384r         | 146                             | 14                                              |
| 2208*      | DG     | No         | ---                  | ZNF384r         | 147                             | 14                                              |
| HV62       | REL    | H1038R     | ---                  | DUX4r           | 148                             | 15                                              |
| H46        | DG     | H1038R     | ---                  | B-rest          | 149                             | 15                                              |
| K163       | REL    | H1038R     | IGH-CEBPA            | B-rest          | 150                             | 15                                              |
| 835        | DG     | H1038R     | ---                  | B-rest          | 151                             | 15                                              |
| H46        | REL    | H1038R     | ---                  | B-rest          | 152                             | 15                                              |
| B207       | DG     | H1038R     | ---                  | B-rest          | 153                             | 16                                              |
| B207       | REL    | H1038R     | ---                  | B-rest          | 154                             | 16                                              |
| 1883*      | DG     | H1038R     | ---                  | B-rest          | 155                             | 16                                              |
| 1883       | REL    | H1038R     | ---                  | B-rest          | 156                             | 16                                              |

\* Included in Zaliouva et al., Haematologica 2019 (doi: 10.3324/haematol.2018.204974)  
ZEB2mut with VAF <20% annotated as "low"

**Supplementary Figure 1. Hierarchical clustering based on expression of genes defining *ETV6-RUNX1*-like and *BCR-ABL1*-like gene expression signature.**

Hierarchical clustering (ward.D method and Euclidean distance linkage) was performed using gene sets defining *ETV6-RUNX1*-like (A) and *BCR-ABL1*-like (B) subtypes described in Zaliouva et al. (Haematologica 2019; doi: 10.3324/haematol.2018.204974). Figure shows resulting dendrograms.

DG – diagnosis, REL – relapse, r – rearrangement, low – variant allele frequency at the DNA level (or cDNA level if DNA not analyzed) < 20%

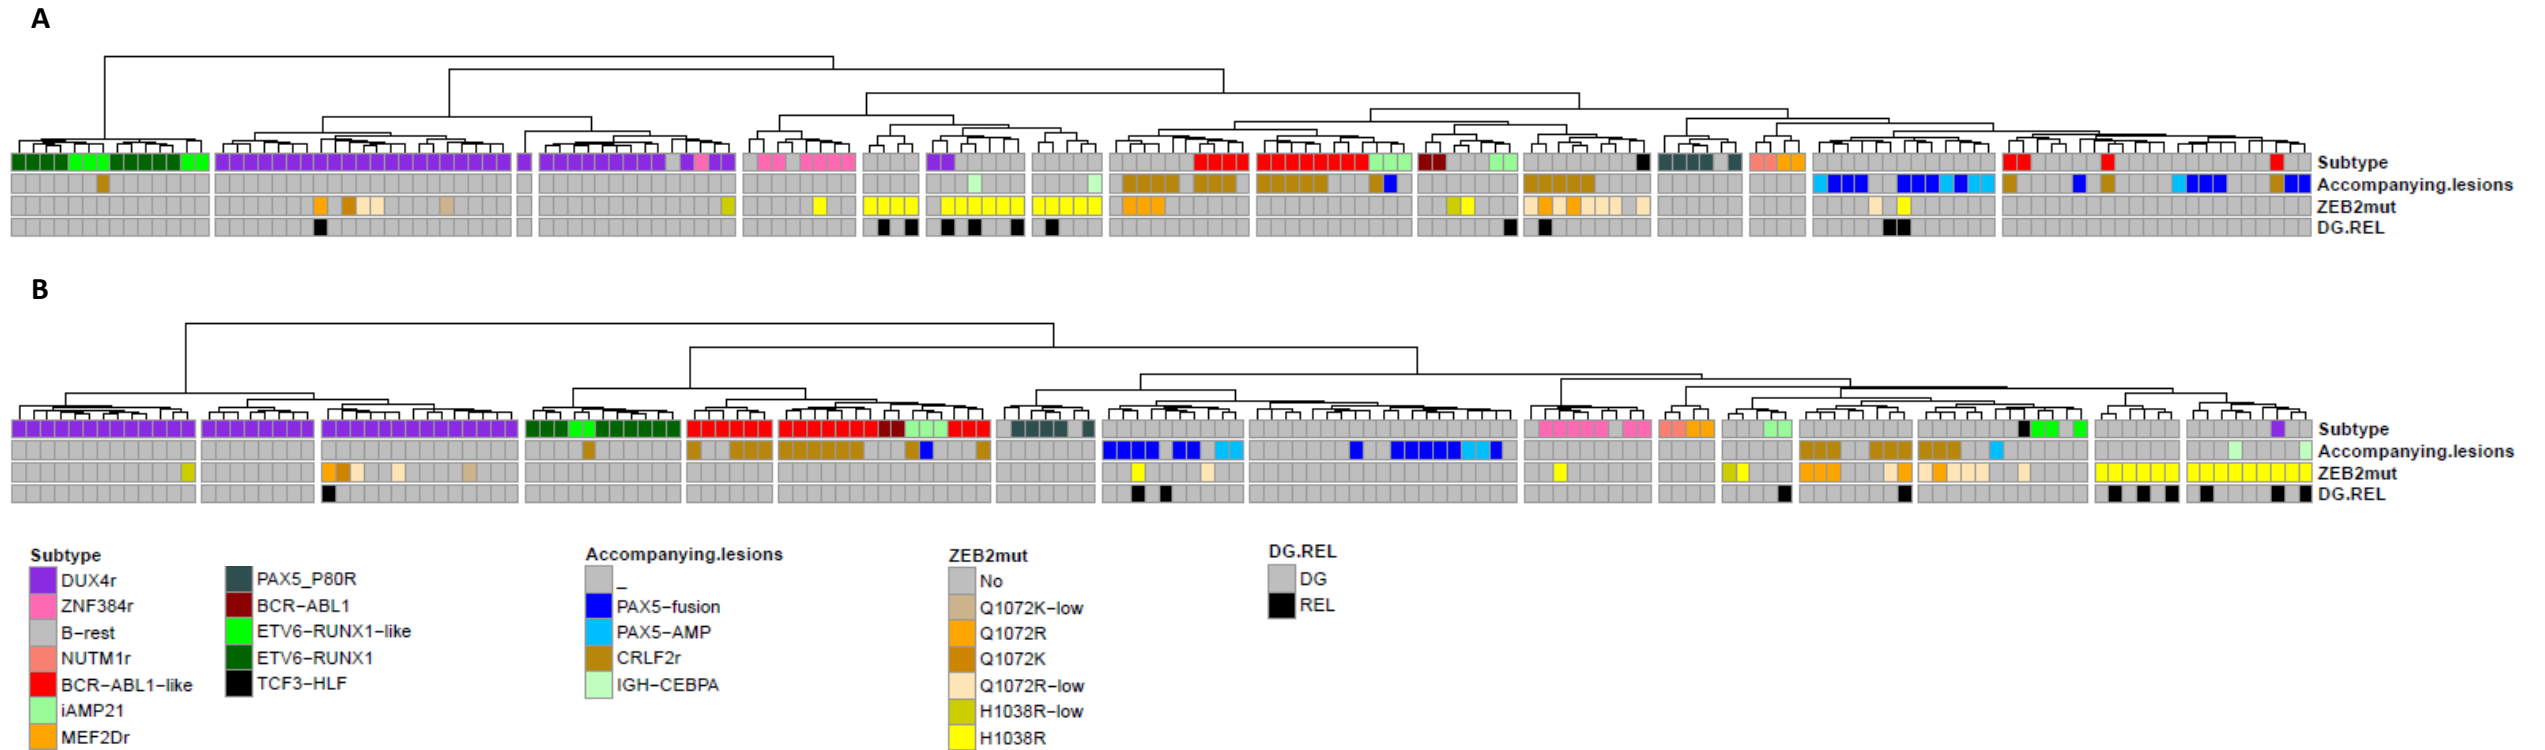

## Supplementary Figure 2. Scheme of the ZEB2 protein and its aberrations.

Figure shows positions of codons H1038 and Q1072 in C-terminal Zinc fingers and point of junction to two identified fusion partners.

Both *TEX41* and *GTDC1* genes are direct neighbors of *ZEB2* (*GTDC1* in centromeric and *TEX41* in telomeric direction). The *GTDC1* gene has the same orientation as *ZEB2* and the fusion (transcript fusion point corresponds to the positions chr2:45147126 and chr2:144832796 at the genomic level) likely results from a deletion. The *TEX41* gene has the opposite orientation and, thus, the fusion (transcript fusion point corresponds to the positions chr2:145147280 and chr2:145552498 at the genomic level) likely results from a more complex rearrangement.

The *ZEB2-TEX41* transcript is predicted to be translated into an aberrant protein where the last 103 amino acids of ZEB2 are replaced by 10 amino acids translated by readthrough into the *TEX41* intron on the non-coding strand. Similarly, the last 51 ZEB2 amino acids are replaced by 4 amino acids resulting from readthrough into the *GTDC1* intron in an aberrant protein potentially resulting from the *ZEB2-GTDC1* fusion.

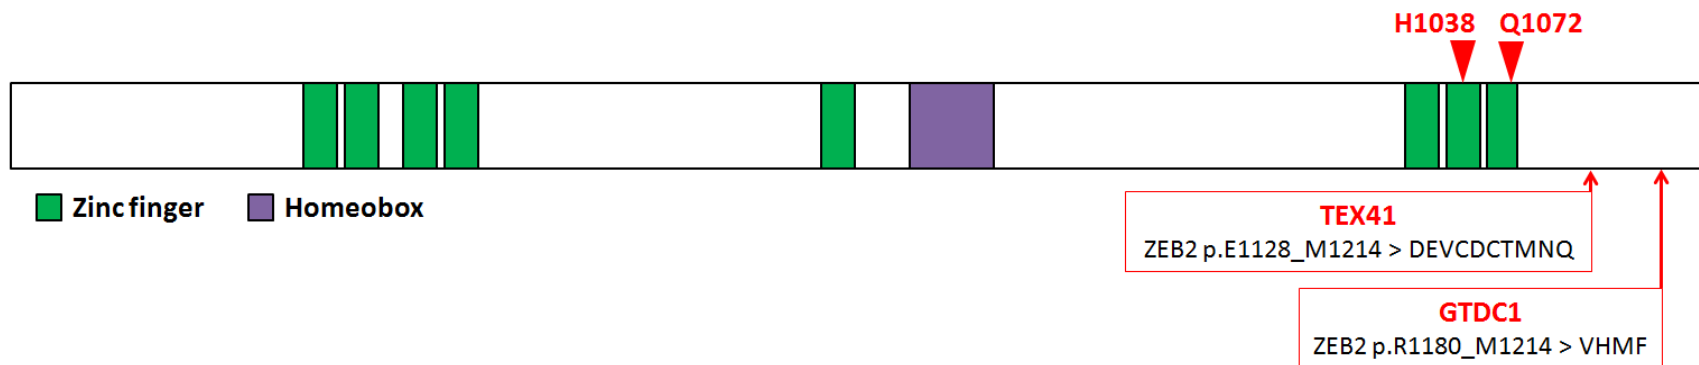

Supplement: 2020_249094_ZALIOVA_SUPPL.pdf [file 2020_249094_ZALIOVA_SUPPL.pdf]
