# Supplementary material for: Frequency and prognostic impact of ZEB2 H1038 and Q1072 mutations in childhood B-other acute lymphoblastic leukemia
Source: PubMed Central journal article supplement — Haematologica. 2020 Jun 4;106(3):886–90. doi: 10.3324/haematol.2020.249094 (PMC7927996; doi:10.3324/haematol.2020.249094), 2020-06-04
Supplement: 2020_249094-Disclosures_Contributions.pdf [file 2020_249094-Disclosures_Contributions.pdf]

Haematologica  
HAEMATOL/2020/249094  
Version 4

Frequency and prognostic impact of ZEB2 H1038 and 1072 mutations  
in childhood B-other acute lymphoblastic leukemia

Marketa Zaliova, Eliska Potuckova, Julius Lukes, Lucie Winkowska,  
Julia Starkova, Iveta Janotova, Lucie Sramkova, Jan Sary, Jan Zuna,  
Martin Stanulla, Martin Zimmermann, Beat Bornhauser, Jean-Pierre  
Bourquin, Cornelia Eckert, Gunnar Cario, and Jan Trka

Disclosures: None

Contributions: MZa and JT designed and led the study, MZa, EP, JL and LW performed molecular genetic analyses, MZa and MZi performed statistical analyses, MZ, JuS, IJ, LS, JaS, JZ, MS, MZi, BB, JPB, CE, GC and JT provided material, data and/or technologies, all authors participated on data analysis and/or interpretation, MZ wrote the draft, all authors revised the draft and contributed to the final manuscript.
